# Supplementary material for: Substituent effects and the role of negative hyperconjugation in siloxycarbene rearrangements
Source: Royal Society of Chemistry journal article supplement (doi:10.1039/b416058d), 2005-01-01
Supplement: b416058d.pdf [file b416058d.pdf]

# Supplementary Information

## Substituent effects and the role of negative hyperconjugation on siloxycarbene rearrangements

*Paul G. Loncke and Gilles H. Peslherbe\**

Centre for Research in Molecular Modeling and

Department of Chemistry and Biochemistry

Concordia University

Montréal, Québec, Canada H4B 1R6

## List of Tables

|           |                                                                                                                                                                             |   |
|-----------|-----------------------------------------------------------------------------------------------------------------------------------------------------------------------------|---|
| Table S 1 | Selected MP2/6-311+G(2d,p) geometric parameters of the minimum-energy conformers of methoxy(substituted-siloxy)carbenes.....                                                | 5 |
| Table S 2 | Selected MP2/6-311+G(2d,p) geometric parameters of the transition states for 1,2-silyl migration and decarbonylation of methoxy(substituted-siloxy)carbenes.....            | 6 |
| Table S 3 | MP2/6-311+G(2d,p) bond critical point electronic densities of the ground-state conformers of methoxy(substituted-siloxy)carbenes.....                                       | 7 |
| Table S 4 | MP2/6-311+G(2d,p) bond critical point electronic densities of the transition states for 1,2-silyl migration and decarbonylation of methoxy(substituted-siloxy)carbenes..... | 8 |

## List of Figures

|             |                                                                                                                                                                              |    |
|-------------|------------------------------------------------------------------------------------------------------------------------------------------------------------------------------|----|
| Figure S 1  | Plots of the HF/6-311+G(2d,p) calculated $\angle C6O7Si$ angles of the methoxy(siloxy)carbene conformers versus Swain-Lupton modified Hammett substituent constants. ....    | 9  |
| Figure S 2  | Plots of the B3LYP/6-311+G(2d,p) calculated $\angle C6O7Si$ angles of the methoxy(siloxy)carbene conformers versus Swain-Lupton modified Hammett substituent constants. .... | 9  |
| Figure S 3  | Plots of the HF/6-311+G(2d,p) bond lengths of conformers A(X) of methoxy(siloxy)carbene versus Swain-Lupton modified Hammett substituent constant $\sigma_1$ .....           | 10 |
| Figure S 4  | Plots of the B3LYP/6-311+G(2d,p) bond lengths of conformers A(X) of methoxy(siloxy)carbenes versus Swain-Lupton modified Hammett substituent constant $\sigma_1$ .....       | 10 |
| Figure S 5  | Plots of the HF/6-311+G(2d,p) bond lengths of conformers B(X) of methoxy(siloxy)carbenes versus Swain-Lupton modified Hammett substituent constant $\sigma_1$ .....          | 11 |
| Figure S 6  | Plots of B3LYP/6-311+G(2d,p) bond lengths for conformers B(X) of methoxy(siloxy)carbenes versus Swain-Lupton modified Hammett substituent constant $\sigma_1$ .....          | 11 |
| Figure S 7  | Plots of the MP2/6-311+G(2d,p) bond lengths for conformers B(X) of methoxy(siloxy)carbenes versus Swain-Lupton modified Hammett substituent constant $\sigma_1$ .....        | 12 |
| Figure S 8  | Plots of the HF/6-311+G(2d,p) bond lengths for conformers C(X) of methoxy(siloxy)carbenes versus Swain-Lupton modified Hammett substituent constant $\sigma_1$ .....         | 12 |
| Figure S 9  | Plots of the B3LYP/6-311+G(2d,p) bond lengths for conformers C(X) of methoxy(siloxy)carbenes versus Swain-Lupton modified Hammett substituent constant $\sigma_1$ .....      | 13 |
| Figure S 10 | Plots of the MP2/6-311+G(2d,p) bond lengths for conformers C(X) of methoxy(siloxy)carbenes versus Swain-Lupton modified Hammett substituent constant $\sigma_1$ .....        | 13 |
| Figure S 11 | Dependence of the O7-Si BCP electronic density on Swain-Lupton modified Hammett substituent constants $\sigma_1$ for conformers A(X). .....                                  | 14 |
| Figure S 12 | Dependence of the O7-Si BCP electronic density on Swain-Lupton modified Hammett substituent constants $\sigma_1$ for conformers B(X).....                                    | 15 |
| Figure S 13 | Dependence of the O7-Si BCP electronic density on Swain-Lupton modified Hammett substituent constants $\sigma_1$ for conformers C(X).....                                    | 15 |

|             |                                                                                                                                                                                                                                                           |    |
|-------------|-----------------------------------------------------------------------------------------------------------------------------------------------------------------------------------------------------------------------------------------------------------|----|
| Figure S 14 | Dependence of the C6-O7 BCP electronic density on Swain-Lupton modified Hammett substituent constants $\sigma_1$ for conformers A(X).                                                                                                                     | 16 |
| Figure S 15 | Dependence of the C6-O7 BCP electronic density on Swain-Lupton modified Hammett substituent constants $\sigma_1$ for conformers B(X).                                                                                                                     | 16 |
| Figure S 16 | Dependence of the C6-O7 BCP electronic density on Swain-Lupton modified Hammett substituent constants $\sigma_1$ for conformers C(X).                                                                                                                     | 17 |
| Figure S 17 | Dependence of the O2-C6 BCP electronic density on Swain-Lupton modified Hammett substituent constants $\sigma_1$ for conformers A(X).                                                                                                                     | 17 |
| Figure S 18 | Dependence of the O2-C6 BCP electronic density on Swain-Lupton modified Hammett substituent constants $\sigma_1$ for conformers B(X).                                                                                                                     | 18 |
| Figure S 19 | Dependence of the O2-C6 BCP electronic density on Swain-Lupton modified Hammett substituent constants $\sigma_1$ for conformers C(X).                                                                                                                     | 18 |
| Figure S 20 | Dependence of the C1-O2 BCP electronic density on Swain-Lupton modified Hammett substituent constants $\sigma_1$ for conformers A(X).                                                                                                                     | 19 |
| Figure S 21 | Dependence of the C1-O2 BCP electronic density on Swain-Lupton modified Hammett substituent constants $\sigma_1$ for conformers B(X).                                                                                                                     | 19 |
| Figure S 22 | Dependence of the C1-O2 BCP electronic density on Swain-Lupton modified Hammett substituent constants $\sigma_1$ for conformers C(X).                                                                                                                     | 20 |
| Figure S 23 | Plots of the $\angle C6O7Si$ angles of conformers A(X) versus stabilization energies $E_{stab}^{(tot)}$ due to hyperconjugation.                                                                                                                          | 20 |
| Figure S 24 | Plots of the $\angle C6O7Si$ angles of conformers B(X) versus stabilization energies $E_{stab}^{(tot)}$ due to hyperconjugation.                                                                                                                          | 21 |
| Figure S 25 | Plots of the $\angle C6O7Si$ angles for conformers C(X) versus stabilization energies $E_{stab}^{(tot)}$ due to hyperconjugation.                                                                                                                         | 21 |
| Figure S 26 | Plots of the O7-Si bond length versus stabilization energies $E_{stab}$ due to $n(\sigma)_{O7} \rightarrow \sigma_{Si-X}^*$ hyperconjugation in conformers A(X). Note that $E_{stab}$ also includes $n(\sigma)_{O7} \rightarrow RY_{Si}^*$ interactions.  | 22 |
| Figure S 27 | Plots of the O7-Si bond length versus stabilization energies $E_{stab}$ due to $n(\sigma)_{O7} \rightarrow \sigma_{Si-X}^*$ hyperconjugation in conformers B(X). Note that $E_{stab}$ also includes $n(\sigma)_{O7} \rightarrow RY_{Si}^*$ interactions.  | 23 |
| Figure S 28 | Plots of the O7-Si bond length versus stabilization energies $E_{stab}$ due to $n(\sigma)_{O7} \rightarrow \sigma_{Si-X}^*$ hyperconjugation in conformers C(X). Note that $E_{stab}$ also includes $n(\sigma)_{O7} \rightarrow RY_{Si}^*$ interactions.  | 23 |
| Figure S 29 | Plots of the C6-O7 bond length versus stabilization energies $E_{stab}$ due to $n(\sigma)_{O7} \rightarrow \sigma_{O2-C6}^*$ hyperconjugation in conformers A(X). Note that $E_{stab}$ also includes $n(\sigma)_{O7} \rightarrow RY_{C6}^*$ interactions. | 24 |
| Figure S 30 | Plots of the C6-O7 bond length versus stabilization energies $E_{stab}$ due to $n(\sigma)_{O7} \rightarrow \sigma_{O2-C6}^*$ hyperconjugation in conformers B(X). Note that $E_{stab}$ also includes $n(\sigma)_{O7} \rightarrow RY_{C6}^*$ interactions. | 24 |

|             |                                                                                                                                                                                                                                                                                                            |    |
|-------------|------------------------------------------------------------------------------------------------------------------------------------------------------------------------------------------------------------------------------------------------------------------------------------------------------------|----|
| Figure S 31 | Plots of the C6-O7 bond length versus stabilization energies $E_{\text{stab}}$ due to $n(\sigma)_{\text{O7}} \rightarrow \sigma^*_{\text{O2-C6}}$ hyperconjugation in conformers C(X). Note that $E_{\text{stab}}$ also includes $n(\sigma)_{\text{O7}} \rightarrow \text{RY}^*_{\text{C6}}$ interactions. | 25 |
| Figure S 32 | Plots of activation enthalpies for 1,2-silyl migration versus computed HF/6-311+G(2d,p) stabilization energies due to hyperconjugation in conformers A(X).                                                                                                                                                 | 25 |
| Figure S 33 | Plots of activation enthalpies for 1,2-silyl migration versus computed HF/6-311+G(2d,p) stabilization energies due to hyperconjugation in conformers B(X).                                                                                                                                                 | 26 |
| Figure S 34 | Plots of activation enthalpies for decarbonylation versus computed HF/6-311+G(2d,p) stabilization energies due to hyperconjugation in conformers C(X).                                                                                                                                                     | 26 |
| Figure S 35 | Plots of activation enthalpies for 1,2-silyl migration versus computed B3LYP/6-311+G(2d,p) stabilization energies due to hyperconjugation in conformers A(X).                                                                                                                                              | 27 |
| Figure S 36 | Plots of activation enthalpies for 1,2-silyl migration versus computed B3LYP/6-311+G(2d,p) stabilization energies due to hyperconjugation in conformers B(X).                                                                                                                                              | 27 |
| Figure S 37 | Plots of activation enthalpies for decarbonylation versus computed B3LYP/6-311+G(2d,p) stabilization energies due to hyperconjugation in conformers C(X).                                                                                                                                                  | 28 |

**Table S 1** Selected MP2/6-311+G(2d,p) geometric parameters of the minimum-energy conformers of methoxy(substituted-siloxy)carbenes.<sup>a</sup>

| X               | $\sigma_1$ | $\angle C6O7Si$ | C1-O2 | O2-C6 | C6-O7 | O7-Si |
|-----------------|------------|-----------------|-------|-------|-------|-------|
| <b>A(X)</b>     |            |                 |       |       |       |       |
| H               | 0.03       | 111.5           | 1.442 | 1.313 | 1.333 | 1.705 |
| NH <sub>2</sub> | 0.08       | 111.9           | 1.441 | 1.318 | 1.326 | 1.717 |
| CCH             | 0.22       | 110.1           | 1.443 | 1.312 | 1.333 | 1.702 |
| SH              | 0.30       | 109.3           | 1.444 | 1.311 | 1.333 | 1.705 |
| OH              | 0.33       | 110.1           | 1.442 | 1.313 | 1.330 | 1.706 |
| Cl              | 0.42       | 105.9           | 1.445 | 1.307 | 1.335 | 1.699 |
| F               | 0.45       | 105.8           | 1.444 | 1.308 | 1.333 | 1.697 |
| CN              | 0.51       | 106.7           | 1.446 | 1.304 | 1.341 | 1.693 |
| <b>B(X)</b>     |            |                 |       |       |       |       |
| H               | 0.03       | 109.8           | 1.456 | 1.307 | 1.345 | 1.710 |
| NH <sub>2</sub> | 0.08       | 110.1           | 1.457 | 1.312 | 1.337 | 1.723 |
| CCH             | 0.22       | 108.6           | 1.460 | 1.306 | 1.345 | 1.700 |
| SH              | 0.30       | 106.8           | 1.461 | 1.303 | 1.348 | 1.704 |
| OH              | 0.33       | 107.5           | 1.458 | 1.308 | 1.341 | 1.713 |
| Cl              | 0.42       | 102.7           | 1.462 | 1.302 | 1.346 | 1.706 |
| F               | 0.45       | 101.3           | 1.461 | 1.302 | 1.342 | 1.707 |
| CN              | 0.51       | 103.6           | 1.463 | 1.298 | 1.352 | 1.700 |
| <b>C(X)</b>     |            |                 |       |       |       |       |
| H               | 0.03       | 124.5           | 1.442 | 1.335 | 1.321 | 1.710 |
| NH <sub>2</sub> | 0.08       | 125.8           | 1.441 | 1.330 | 1.318 | 1.722 |
| CCH             | 0.22       | 124.0           | 1.443 | 1.336 | 1.323 | 1.711 |
| SH              | 0.30       | 124.2           | 1.444 | 1.336 | 1.324 | 1.711 |
| OH              | 0.33       | 125.1           | 1.442 | 1.338 | 1.321 | 1.710 |
| Cl              | 0.42       | 123.2           | 1.445 | 1.336 | 1.326 | 1.702 |
| F               | 0.45       | 123.7           | 1.444 | 1.337 | 1.324 | 1.696 |
| CN              | 0.51       | 122.3           | 1.446 | 1.333 | 1.329 | 1.701 |

<sup>a</sup> Bond angles and interatomic distances are in degrees and Å, respectively.

**Table S 2** Selected MP2/6-311+G(2d,p) geometric parameters of the transition states for 1,2-silyl migration and decarbonylation of methoxy(substituted-siloxy)carbenes.<sup>a</sup>

| X                         | $\sigma_1$ | $\angle C6O7Si$ | C1-O2 | O2-C6 | C6-O7 | O7-Si |
|---------------------------|------------|-----------------|-------|-------|-------|-------|
| <b>TS<sub>AD</sub>(X)</b> |            |                 |       |       |       |       |
| H                         | 0.03       | 74.1            | 1.435 | 1.311 | 1.285 | 1.900 |
| NH <sub>2</sub>           | 0.08       | 78.7            | 1.445 | 1.313 | 1.289 | 1.845 |
| CCH                       | 0.22       | 72.5            | 1.447 | 1.310 | 1.282 | 1.912 |
| SH                        | 0.30       | 74.8            | 1.448 | 1.306 | 1.287 | 1.873 |
| OH                        | 0.33       | 73.9            | 1.446 | 1.310 | 1.282 | 1.898 |
| Cl                        | 0.42       | 68.7            | 1.448 | 1.307 | 1.274 | 1.955 |
| F                         | 0.45       | 68.1            | 1.447 | 1.310 | 1.271 | 1.970 |
| CN                        | 0.51       | 70.6            | 1.450 | 1.303 | 1.282 | 1.918 |
| <b>TS<sub>BE</sub>(X)</b> |            |                 |       |       |       |       |
| H                         | 0.03       | 74.2            | 1.459 | 1.305 | 1.296 | 1.898 |
| NH <sub>2</sub>           | 0.08       | 79.6            | 1.458 | 1.307 | 1.301 | 1.834 |
| CCH                       | 0.22       | 72.4            | 1.460 | 1.304 | 1.292 | 1.909 |
| SH                        | 0.30       | 75.6            | 1.461 | 1.301 | 1.300 | 1.859 |
| OH                        | 0.33       | 74.9            | 1.459 | 1.304 | 1.294 | 1.882 |
| Cl                        | 0.42       | 68.5            | 1.460 | 1.301 | 1.294 | 1.882 |
| F                         | 0.45       | 69.3            | 1.459 | 1.303 | 1.283 | 1.942 |
| CN                        | 0.51       | 70.6            | 1.462 | 1.297 | 1.292 | 1.914 |
| <b>TS<sub>CH</sub>(X)</b> |            |                 |       |       |       |       |
| H                         | 0.03       | 103.3           | 1.439 | 1.475 | 1.253 | 1.951 |
| NH <sub>2</sub>           | 0.08       | 105.0           | 1.438 | 1.446 | 1.263 | 1.899 |
| CCH                       | 0.22       | 103.4           | 1.440 | 1.477 | 1.253 | 1.937 |
| SH                        | 0.30       | 103.4           | 1.441 | 1.459 | 1.260 | 1.920 |
| OH                        | 0.33       | 103.5           | 1.439 | 1.469 | 1.257 | 1.937 |
| Cl                        | 0.42       | 103.7           | 1.445 | 1.447 | 1.266 | 1.879 |
| F                         | 0.45       | 103.8           | 1.442 | 1.445 | 1.266 | 1.882 |
| CN                        | 0.51       | 102.4           | 1.443 | 1.505 | 1.249 | 1.934 |

<sup>a</sup> Bond angles and interatomic distances are in degrees and Å, respectively.

**Table S 3** MP2/6-311+G(2d,p) bond critical point electronic densities of the ground-state conformers of methoxy(substituted-siloxy)carbenes.<sup>a</sup>

| X               | C1-O2 | O2-C6 | C6-O7 | O7-Si |
|-----------------|-------|-------|-------|-------|
| <b>A(X)</b>     |       |       |       |       |
| H               | 1.596 | 2.152 | 2.070 | 0.811 |
| NH <sub>2</sub> | 1.607 | 2.126 | 2.101 | 0.791 |
| CCH             | 1.593 | 2.159 | 2.066 | 0.827 |
| SH              | 1.590 | 2.161 | 2.066 | 0.822 |
| OH              | 1.598 | 2.149 | 2.082 | 0.818 |
| Cl              | 1.583 | 2.181 | 2.062 | 0.843 |
| F               | 1.586 | 2.178 | 2.073 | 0.846 |
| CN              | 1.573 | 2.200 | 2.034 | 0.853 |
| <b>B(X)</b>     |       |       |       |       |
| H               | 1.548 | 2.164 | 2.002 | 0.800 |
| NH <sub>2</sub> | 1.562 | 2.138 | 2.036 | 0.780 |
| CCH             | 1.543 | 2.172 | 1.999 | 0.818 |
| SH              | 1.536 | 2.186 | 1.989 | 0.824 |
| OH              | 1.552 | 2.162 | 2.021 | 0.806 |
| Cl              | 1.532 | 2.197 | 2.007 | 0.828 |
| F               | 1.535 | 2.195 | 2.028 | 0.825 |
| CN              | 1.521 | 2.216 | 1.976 | 0.839 |
| <b>C(X)</b>     |       |       |       |       |
| H               | 1.587 | 2.036 | 2.089 | 0.781 |
| NH <sub>2</sub> | 1.599 | 2.013 | 2.108 | 0.769 |
| CCH             | 1.584 | 2.034 | 2.083 | 0.798 |
| SH              | 1.570 | 2.062 | 2.105 | 0.805 |
| OH              | 1.589 | 2.026 | 2.089 | 0.795 |
| Cl              | 1.573 | 2.036 | 2.063 | 0.822 |
| F               | 1.577 | 2.029 | 2.073 | 0.830 |
| CN              | 1.561 | 2.048 | 2.053 | 0.824 |

<sup>a</sup> BCP electronic densities are in e/Å<sup>3</sup> and were obtained from AIM analysis.

**Table S 4** MP2/6-311+G(2d,p) bond critical point electronic densities of the transition states for 1,2-silyl migration and decarbonylation of methoxy(substituted-siloxy)carbenes.<sup>a</sup>

| X                         | C1-O2 | O2-C6 | C6-O7 | O7-Si | C6-Si |
|---------------------------|-------|-------|-------|-------|-------|
| <b>TS<sub>AD</sub>(X)</b> |       |       |       |       |       |
| H                         | 1.572 | 2.160 | 2.381 | 0.513 | 0.499 |
| NH <sub>2</sub>           | 1.582 | 2.151 | 2.347 | 0.578 | -     |
| CCH                       | 1.567 | 2.167 | 2.399 | 0.511 | 0.533 |
| SH                        | 1.562 | 2.185 | 2.362 | 0.551 | -     |
| OH                        | 1.572 | 2.166 | 2.387 | 0.518 | 0.504 |
| Cl                        | 1.558 | 2.184 | 2.442 | -     | 0.605 |
| F                         | 1.566 | 2.171 | 2.461 | -     | 0.610 |
| CN                        | 1.547 | 2.205 | 2.400 | -     | 0.581 |
| <b>TS<sub>BE</sub>(X)</b> |       |       |       |       |       |
| H                         | 1.532 | 2.192 | 2.311 | 0.512 | 0.494 |
| NH <sub>2</sub>           | 1.543 | 2.179 | 2.270 | 0.589 | -     |
| CCH                       | 1.528 | 2.201 | 2.333 | 0.509 | 0.531 |
| SH                        | 1.524 | 2.215 | 2.285 | 0.564 | -     |
| OH                        | 1.537 | 2.196 | 2.312 | 0.531 | -     |
| Cl                        | 1.521 | 2.219 | 2.381 | -     | 0.608 |
| F                         | 1.528 | 2.210 | 2.382 | -     | 0.593 |
| CN                        | 1.508 | 2.239 | 2.334 | -     | 0.580 |
| <b>TS<sub>CH</sub>(X)</b> |       |       |       |       |       |
|                           | C1-O2 | O2-C6 | C6-O7 | O7-Si | O2-Si |
| H                         | 1.559 | 1.456 | 2.533 | 0.469 | 0.405 |
| NH <sub>2</sub>           | 1.568 | 1.560 | 2.465 | 0.526 | 0.351 |
| CCH                       | 1.555 | 1.448 | 2.530 | 0.488 | 0.417 |
| SH                        | 1.547 | 1.510 | 2.486 | 0.512 | 0.400 |
| OH                        | 1.558 | 1.478 | 2.507 | 0.485 | 0.400 |
| Cl                        | 1.519 | 1.551 | 2.460 | 0.555 | 0.416 |
| F                         | 1.536 | 1.559 | 2.457 | 0.551 | 0.405 |
| CN                        | 1.534 | 1.357 | 2.553 | 0.489 | 0.474 |

<sup>a</sup> BCP electronic densities are in e/Å<sup>3</sup> and were obtained from AIM analysis.



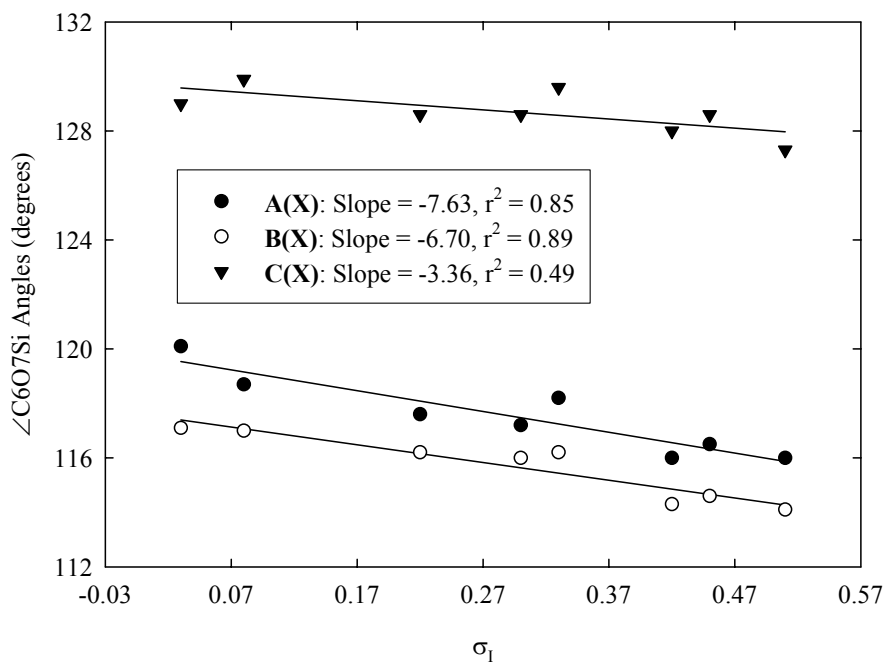

**Figure S 1** Plots of the HF/6-311+G(2d,p) calculated  $\angle\text{C6O7Si}$  angles of the methoxy(substituted-siloxy)carbene conformers versus Swain-Lupton modified Hammett substituent constants.

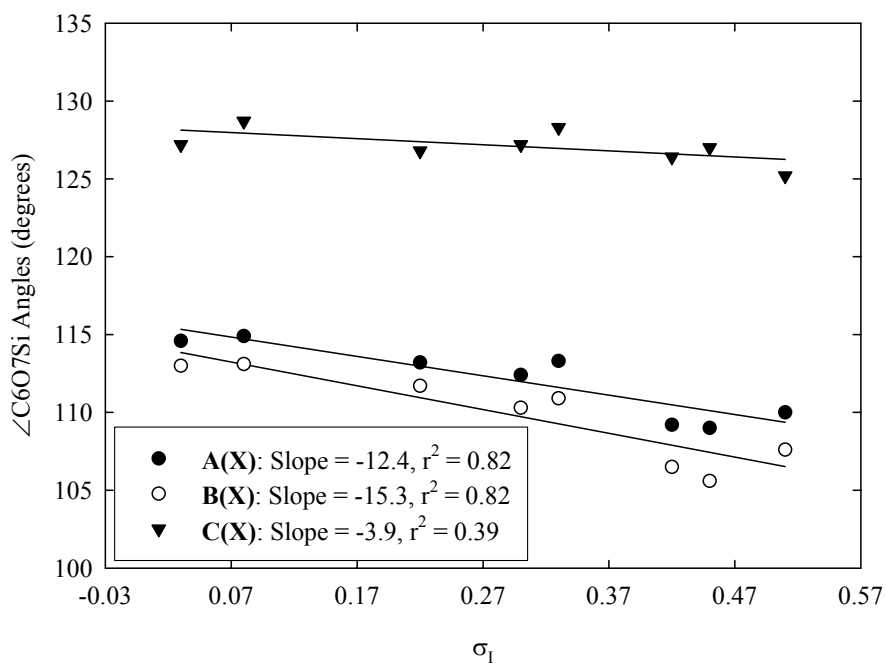

**Figure S 2** Plots of the B3LYP/6-311+G(2d,p) calculated  $\angle\text{C6O7Si}$  angles of the methoxy(substituted-siloxy)carbene conformers versus Swain-Lupton modified Hammett substituent constants.

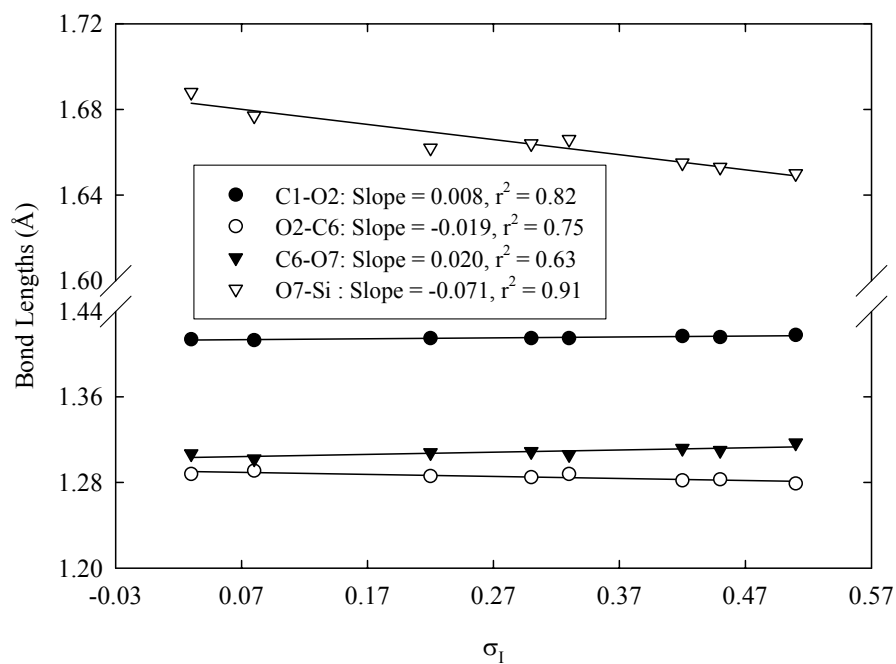

**Figure S 3** Plots of the HF/6-311+G(2d,p) bond lengths of conformers A(X) of methoxy(substituted-siloxy)carbene versus Swain-Lupton modified Hammett substituent constant  $\sigma_1$ .

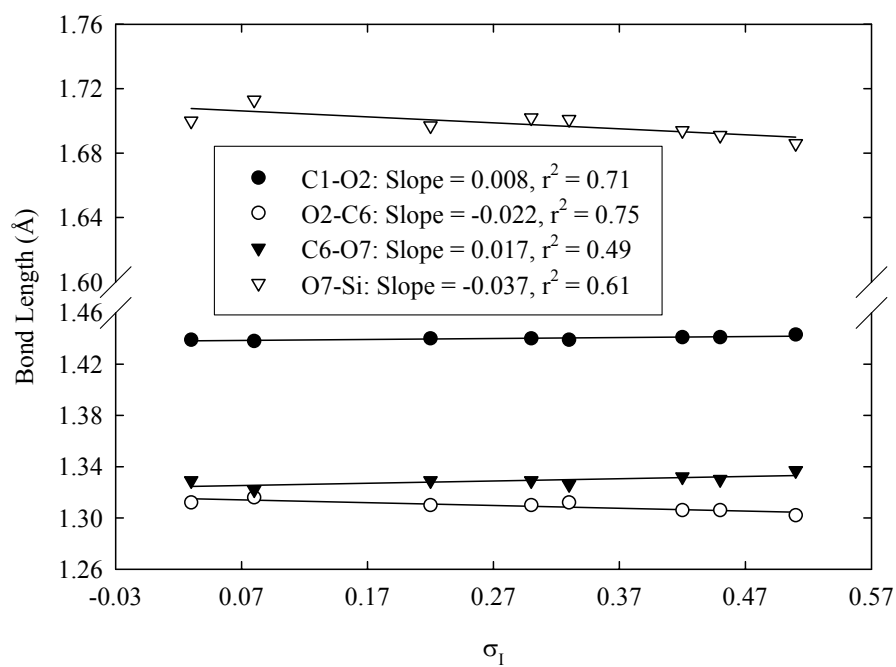

**Figure S 4** Plots of the B3LYP/6-311+G(2d,p) bond lengths of conformers A(X) of methoxy(substituted-siloxy)carbenes versus Swain-Lupton modified Hammett substituent constant  $\sigma_1$ .

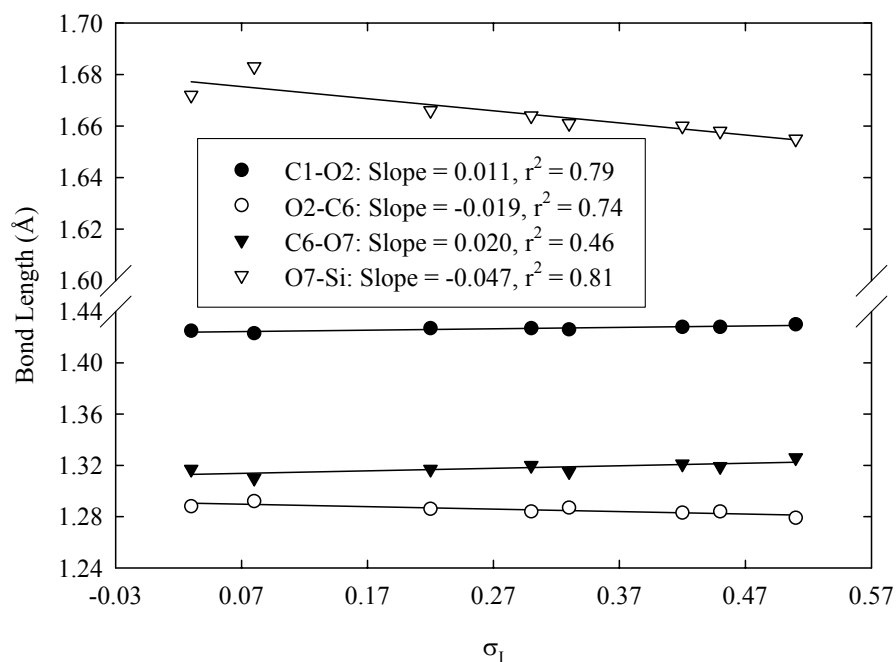

**Figure S 5** Plots of the HF/6-311+G(2d,p) bond lengths of conformers **B(X)** of methoxy(substituted-siloxy)carbenes versus Swain-Lupton modified Hammett substituent constant  $\sigma_I$ .

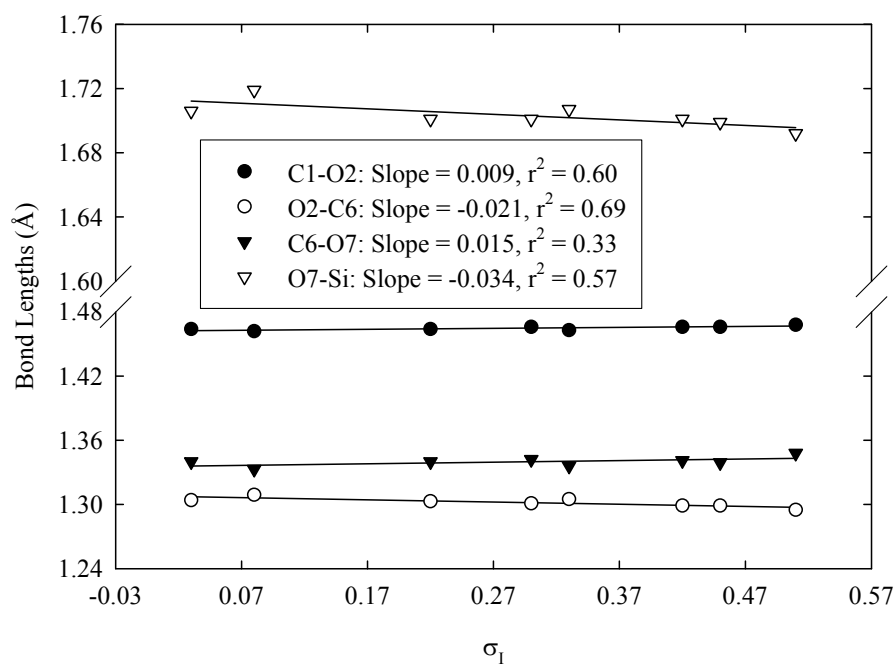

**Figure S 6** Plots of the B3LYP/6-311+G(2d,p) bond lengths for conformers **B(X)** of methoxy(substituted-siloxy)carbenes versus Swain-Lupton modified Hammett substituent constant  $\sigma_I$ .

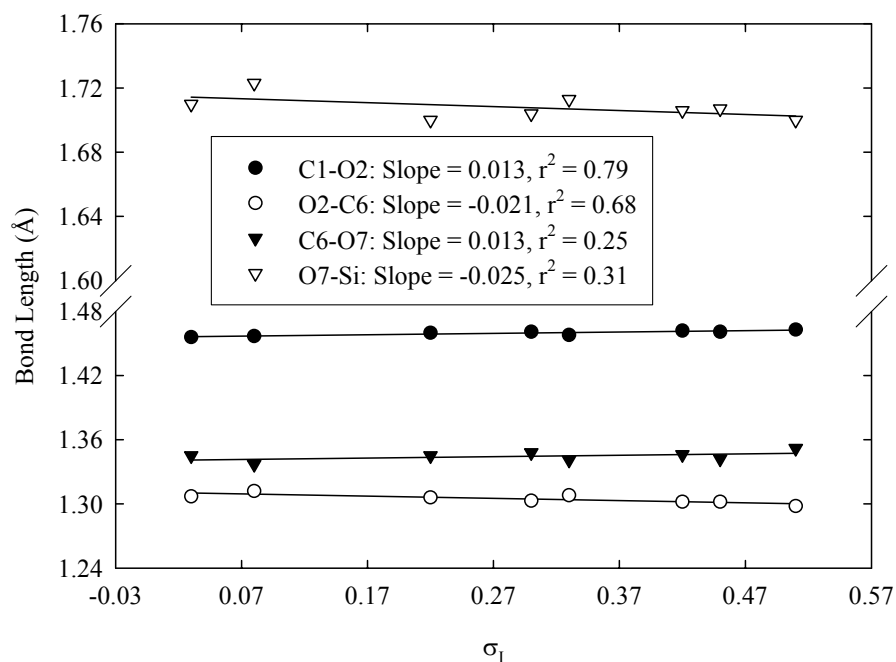

**Figure S 7** Plots of the MP2/6-311+G(2d,p) bond lengths for conformers **B(X)** of methoxy(substituted-siloxy)carbenes versus Swain-Lupton modified Hammett substituent constant  $\sigma_1$ .

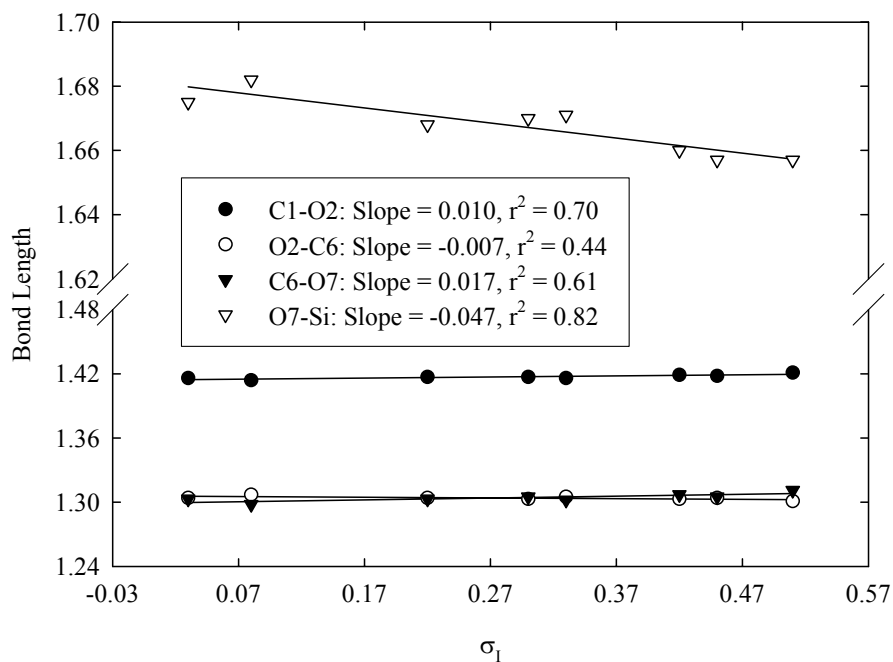

**Figure S 8** Plots of the HF/6-311+G(2d,p) bond lengths for conformers **C(X)** of methoxy(substituted-siloxy)carbenes versus Swain-Lupton modified Hammett substituent constant  $\sigma_1$ .

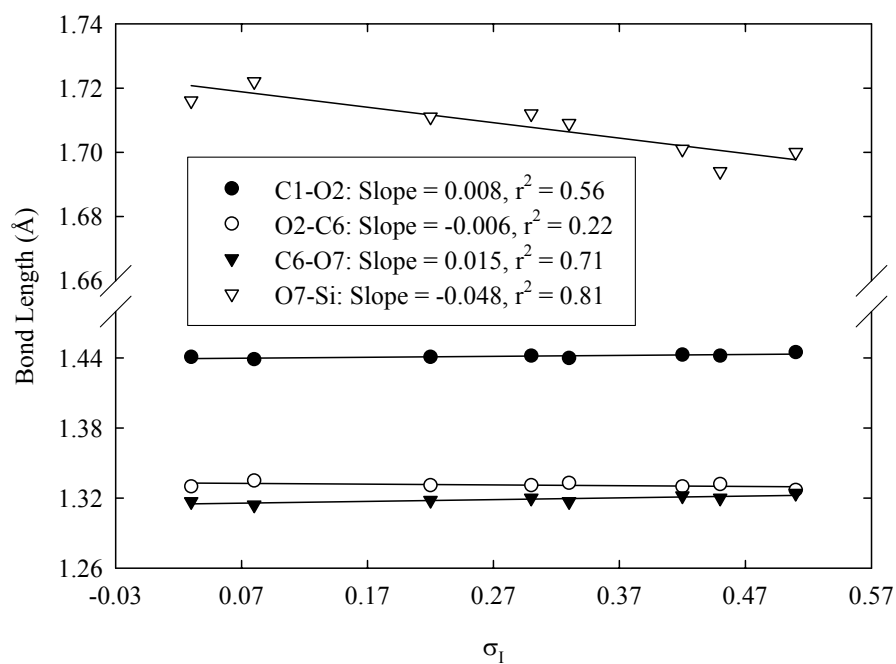

**Figure S 9** Plots of the B3LYP/6-311+G(2d,p) bond lengths for conformers **C(X)** of methoxy(substituted-siloxy)carbenes versus Swain-Lupton modified Hammett substituent constant  $\sigma_1$ .

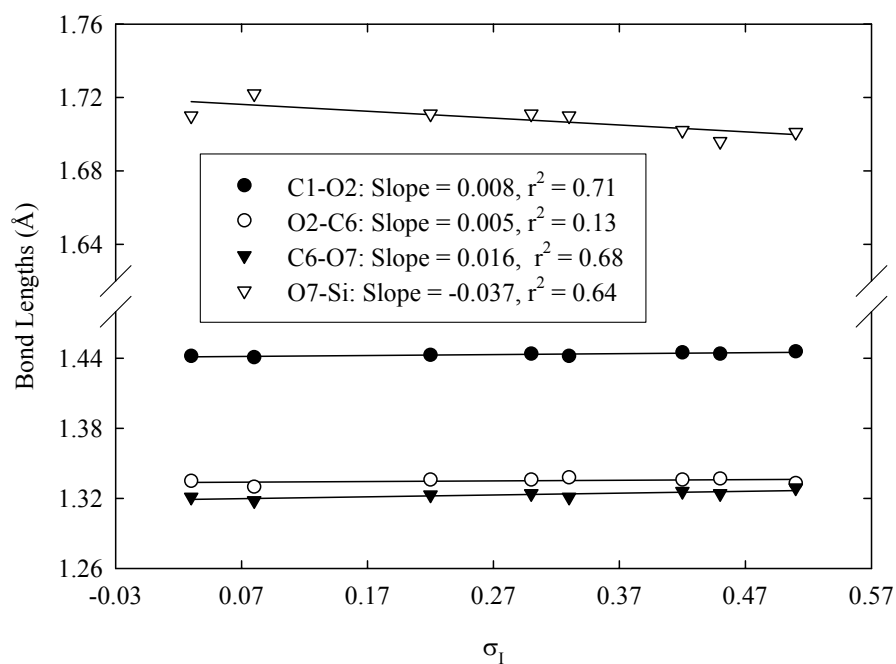

**Figure S 10** Plots of the MP2/6-311+G(2d,p) bond lengths for conformers **C(X)** of methoxy(substituted-siloxy)carbenes versus Swain-Lupton modified Hammett substituent constant  $\sigma_1$ .

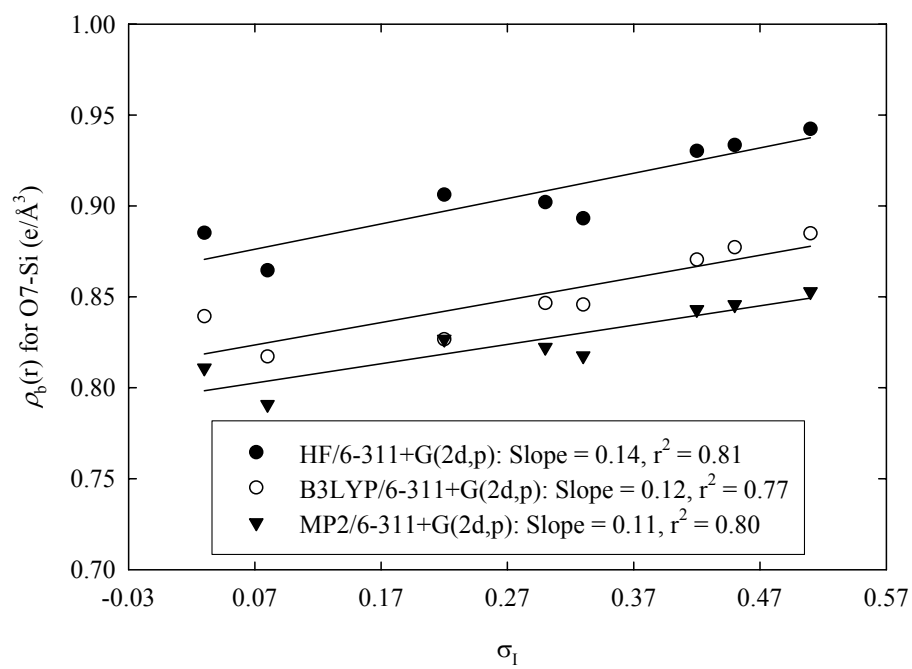

**Figure S 11** Dependence of the O7-Si BCP electronic density on Swain-Lupton modified Hammett substituent constants  $\sigma_1$  for conformers **A(X)**.

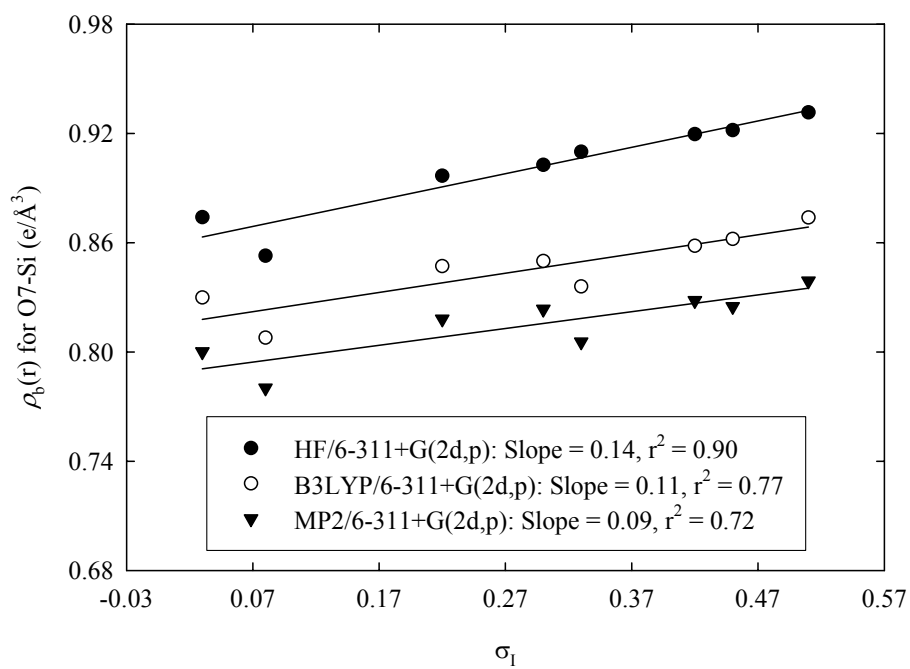

**Figure S 12** Dependence of the O7-Si BCP electronic density on Swain-Lupton modified Hammett substituent constants  $\sigma_1$  for conformers **B(X)**.

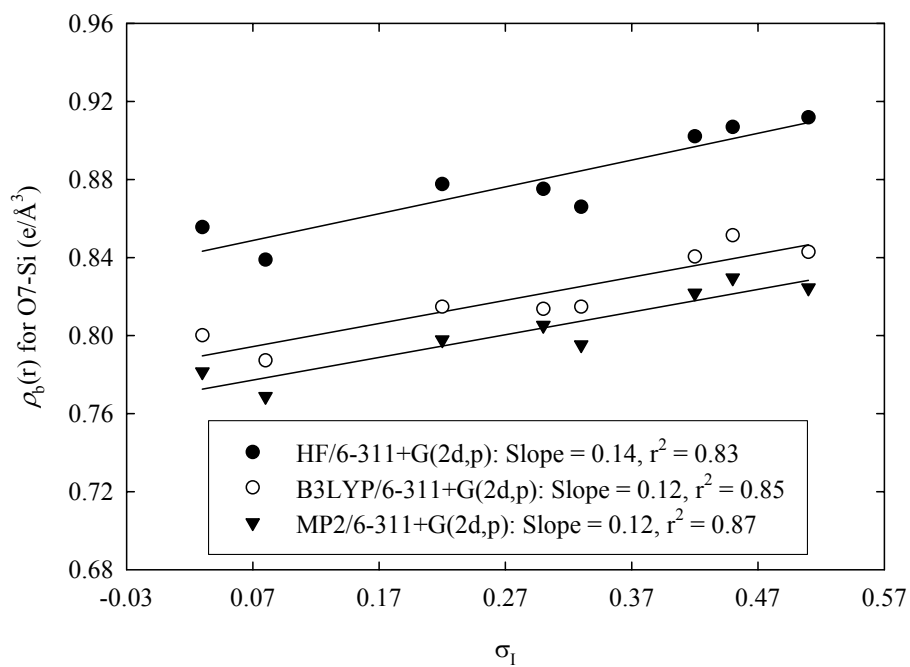

**Figure S 13** Dependence of the O7-Si BCP electronic density on Swain-Lupton modified Hammett substituent constants  $\sigma_1$  for conformers **C(X)**.

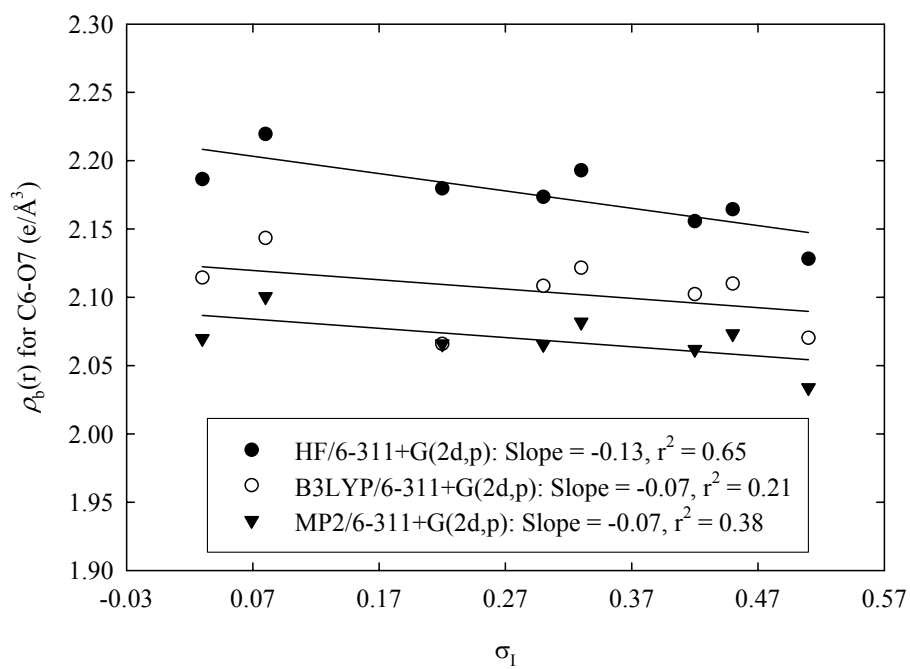

**Figure S 14** Dependence of the C6-O7 BCP electronic density on Swain-Lupton modified Hammett substituent constants  $\sigma_1$  for conformers **A(X)**.

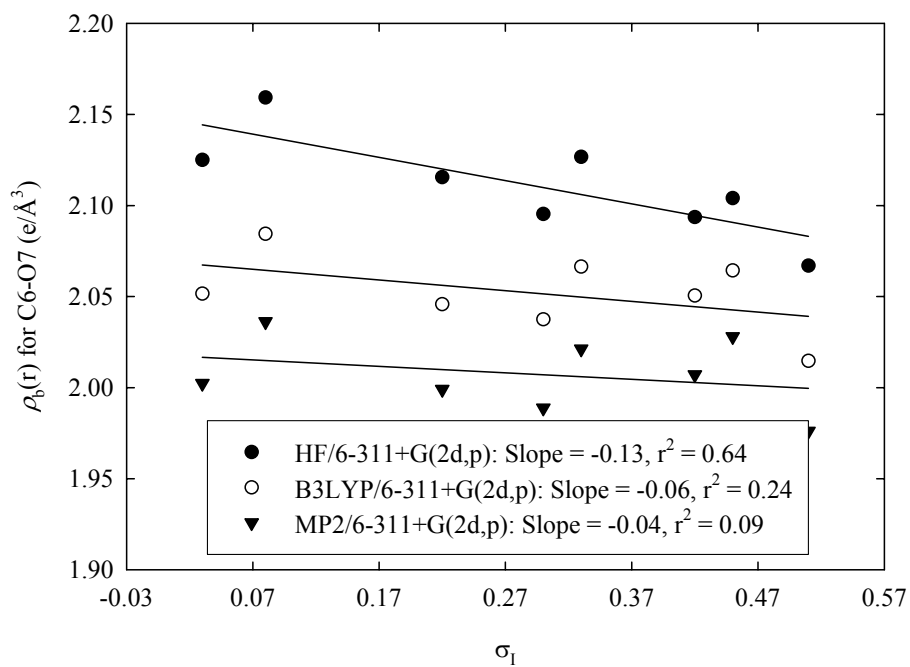

**Figure S 15** Dependence of the C6-O7 BCP electronic density on Swain-Lupton modified Hammett substituent constants  $\sigma_1$  for conformers **B(X)**.



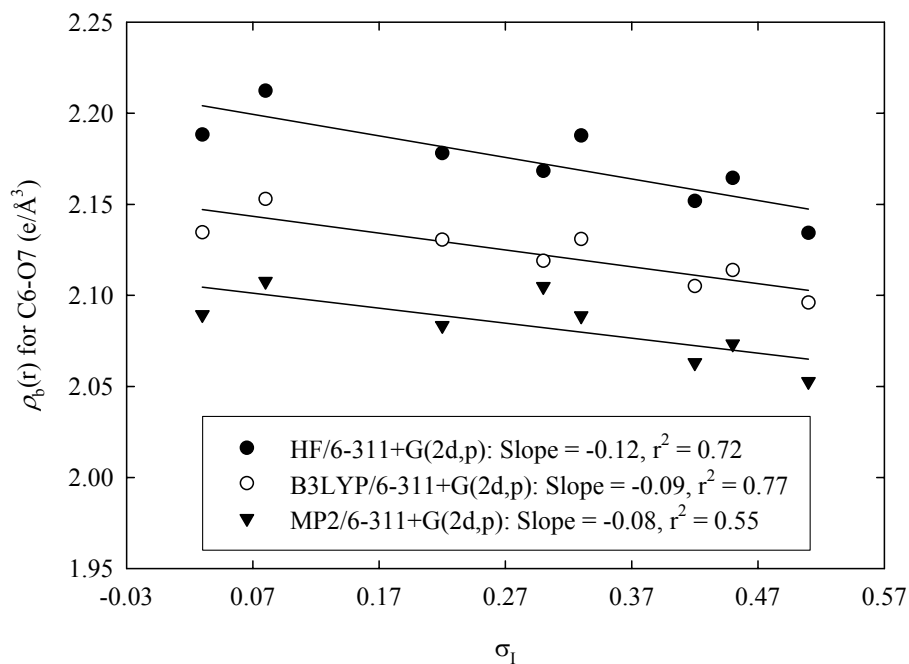

**Figure S 16** Dependence of the C6-O7 BCP electronic density on Swain-Lupton modified Hammett substituent constants  $\sigma_1$  for conformers **C(X)**.

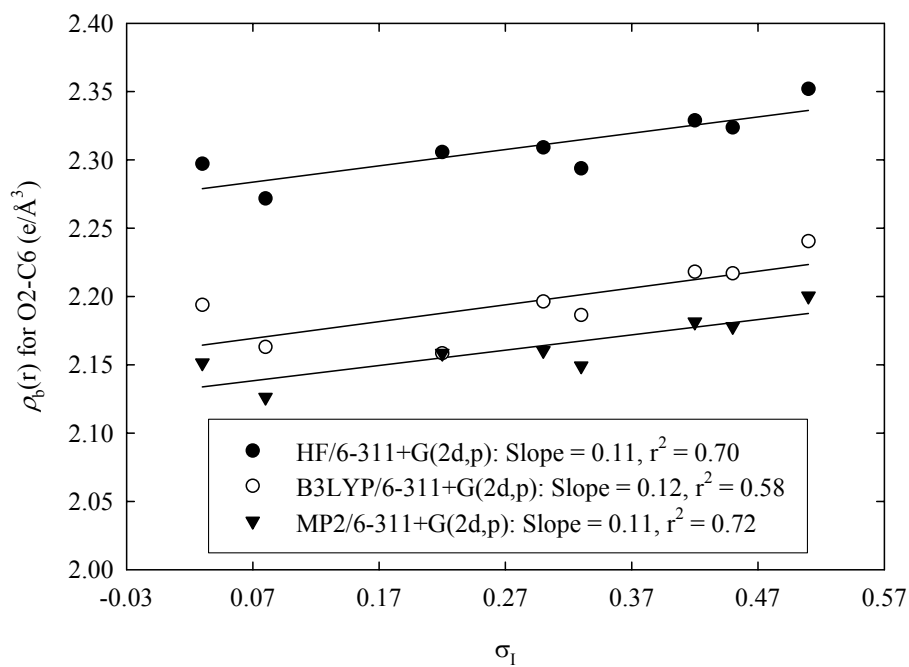

**Figure S 17** Dependence of the O2-C6 BCP electronic density on Swain-Lupton modified Hammett substituent constants  $\sigma_1$  for conformers **A(X)**.

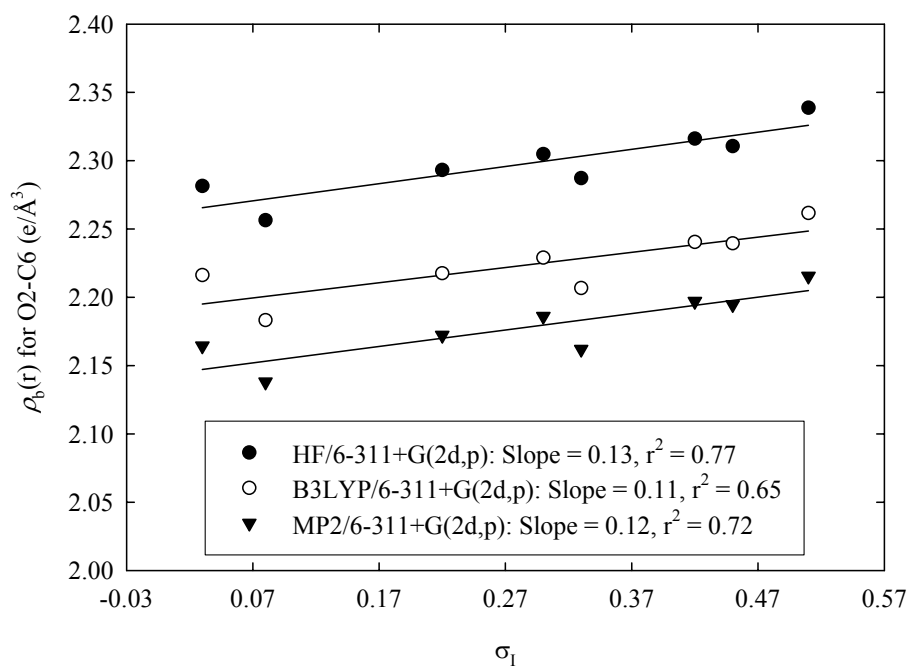

**Figure S 18** Dependence of the O2-C6 BCP electronic density on Swain-Lupton modified Hammett substituent constants  $\sigma_1$  for conformers **B(X)**.

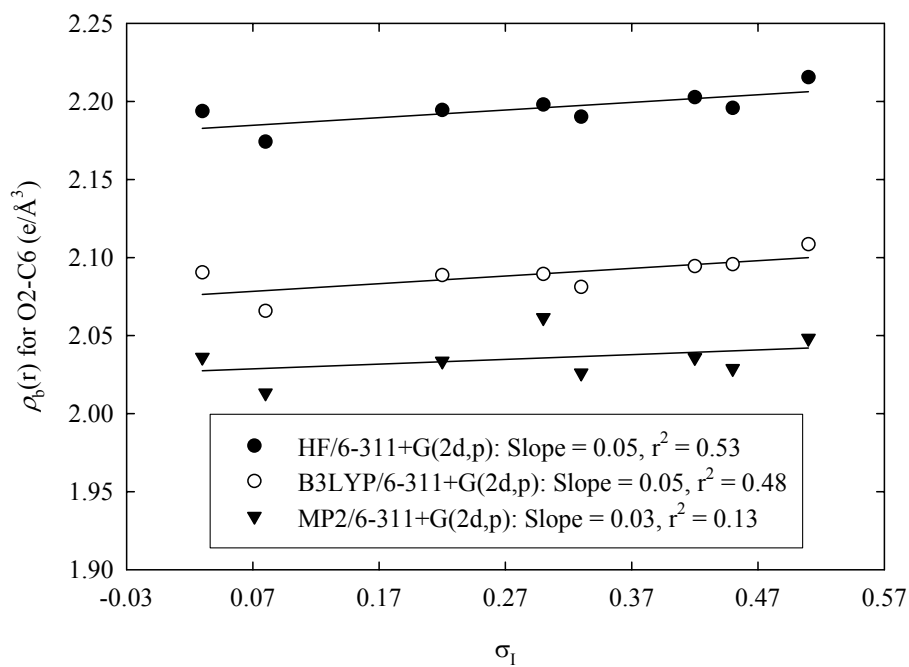

**Figure S 19** Dependence of the O2-C6 BCP electronic density on Swain-Lupton modified Hammett substituent constants  $\sigma_1$  for conformers **C(X)**.

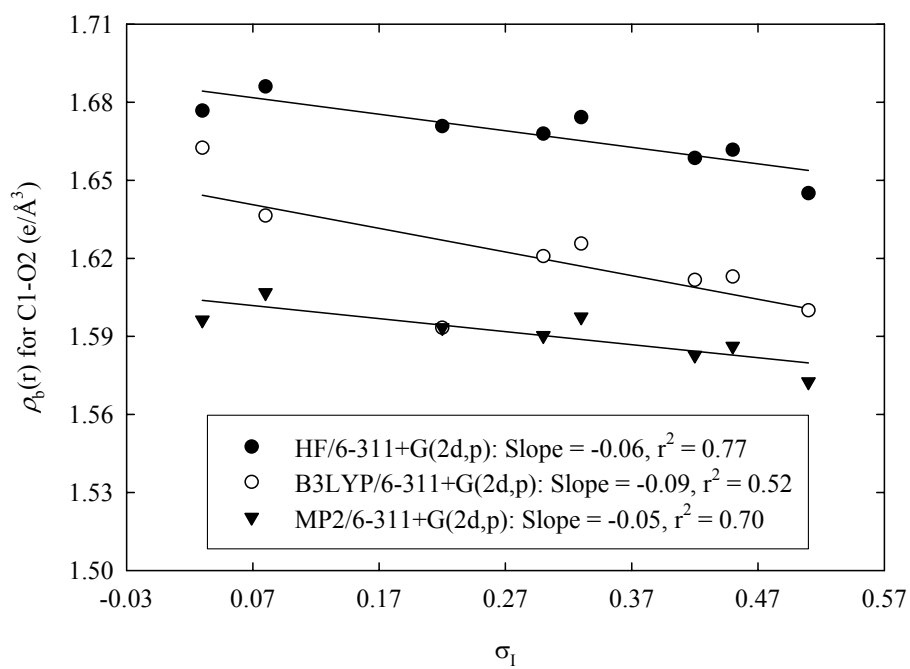

**Figure S 20** Dependence of the C1-O2 BCP electronic density on Swain-Lupton modified Hammett substituent constants  $\sigma_1$  for conformers **A(X)**.

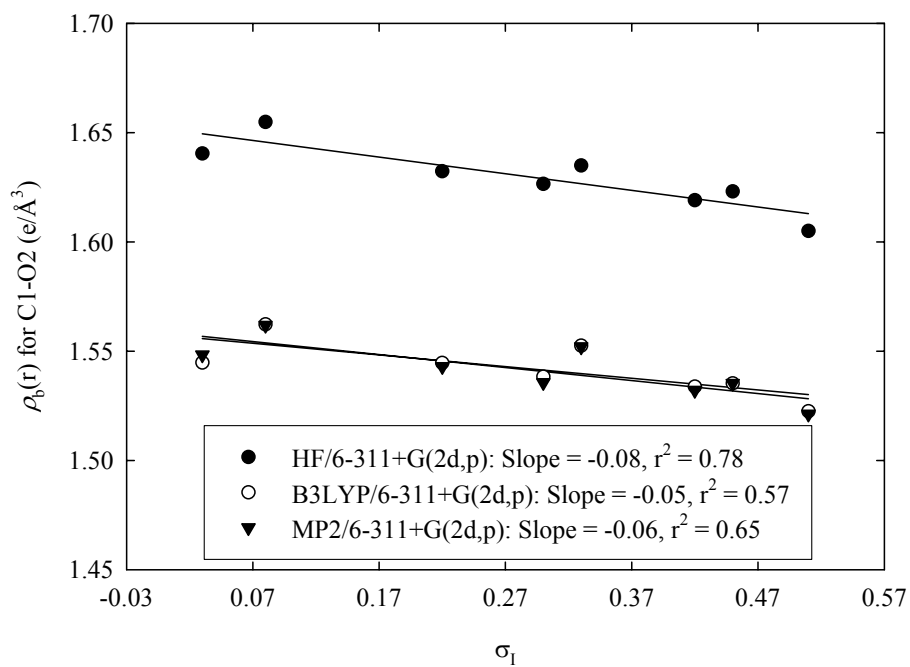

**Figure S 21** Dependence of the C1-O2 BCP electronic density on Swain-Lupton modified Hammett substituent constants  $\sigma_1$  for conformers **B(X)**.

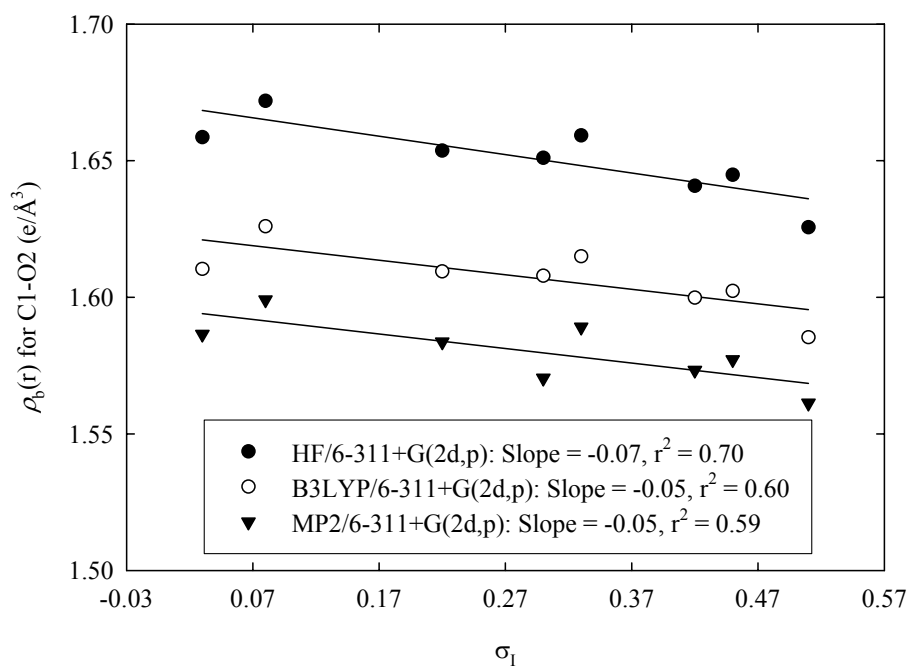

**Figure S 22** Dependence of the C1-O2 BCP electronic density on Swain-Lupton modified Hammett substituent constants  $\sigma_1$  for conformers **C(X)**.

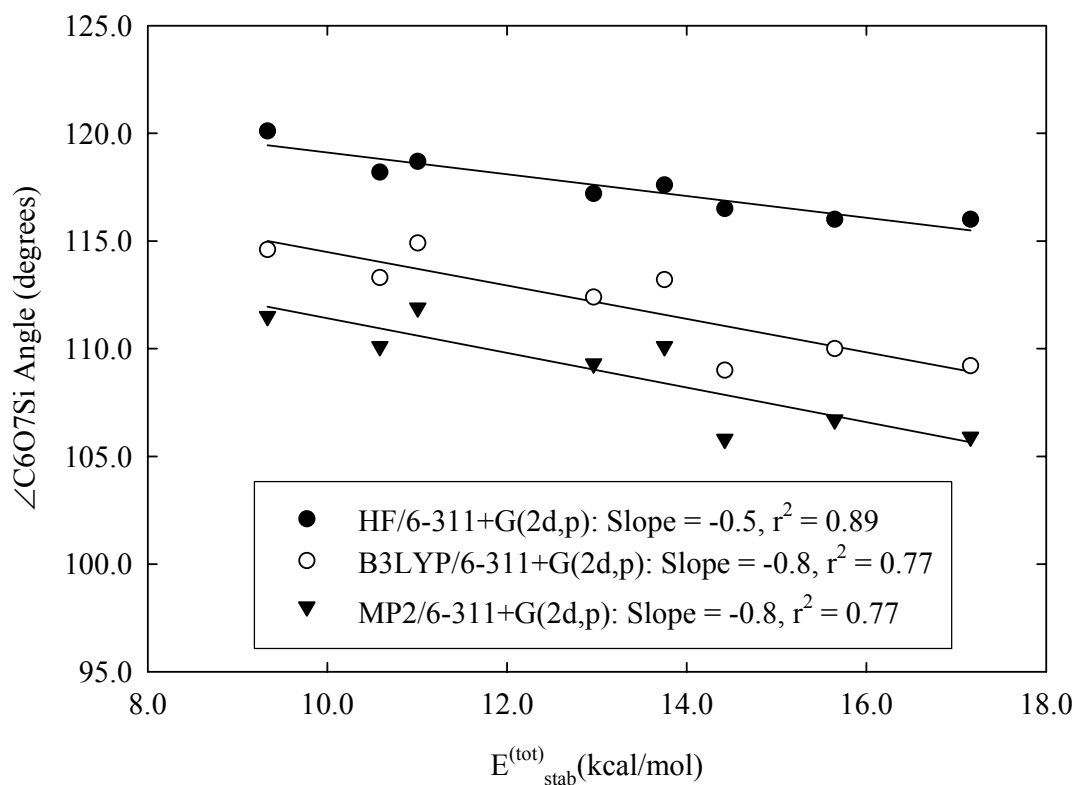

**Figure S 23** Plots of the  $\angle\text{C6O7Si}$  angles of conformers **A(X)** versus stabilization energies  $E_{\text{stab}}^{(\text{tot})}$  due to hyperconjugation.

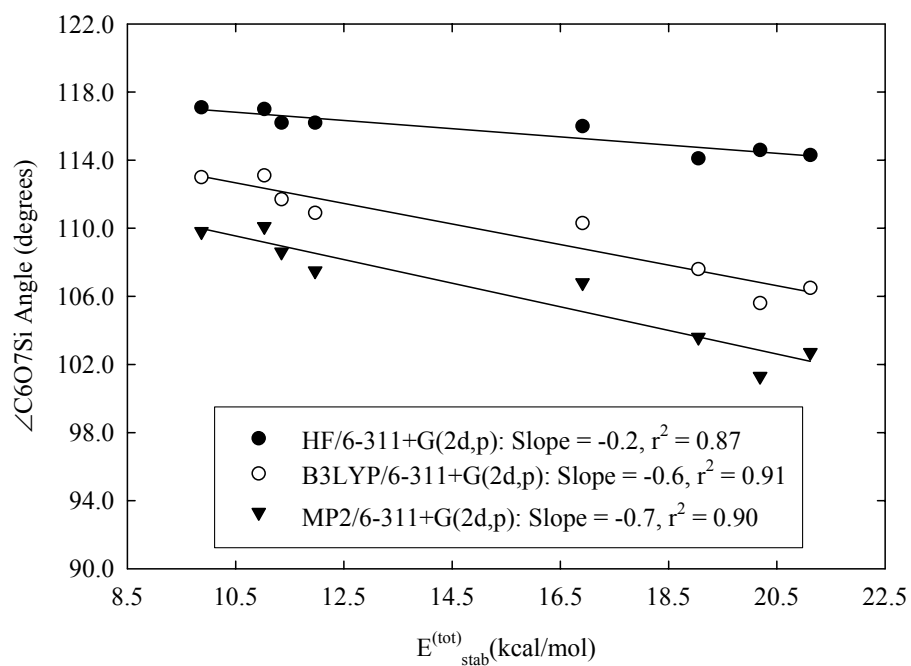

**Figure S 24** Plots of the  $\angle\text{C6O7Si}$  angles of conformers **B(X)** versus stabilization energies  $E_{\text{stab}}^{(\text{tot})}$  due to hyperconjugation.

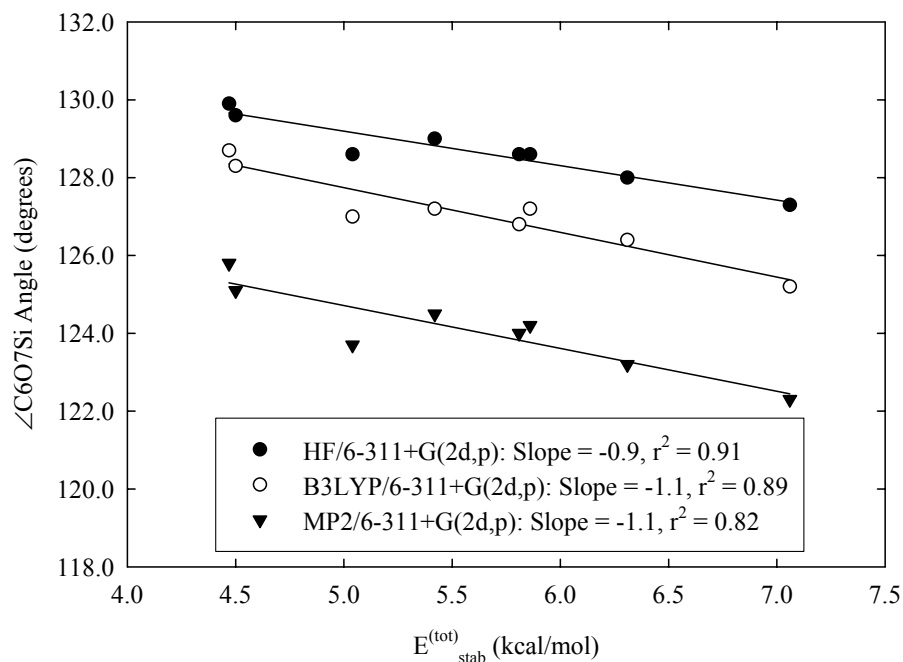

**Figure S 25** Plots of the  $\angle\text{C6O7Si}$  angles for conformers **C(X)** versus stabilization energies  $E_{\text{stab}}^{(\text{tot})}$  due to hyperconjugation.

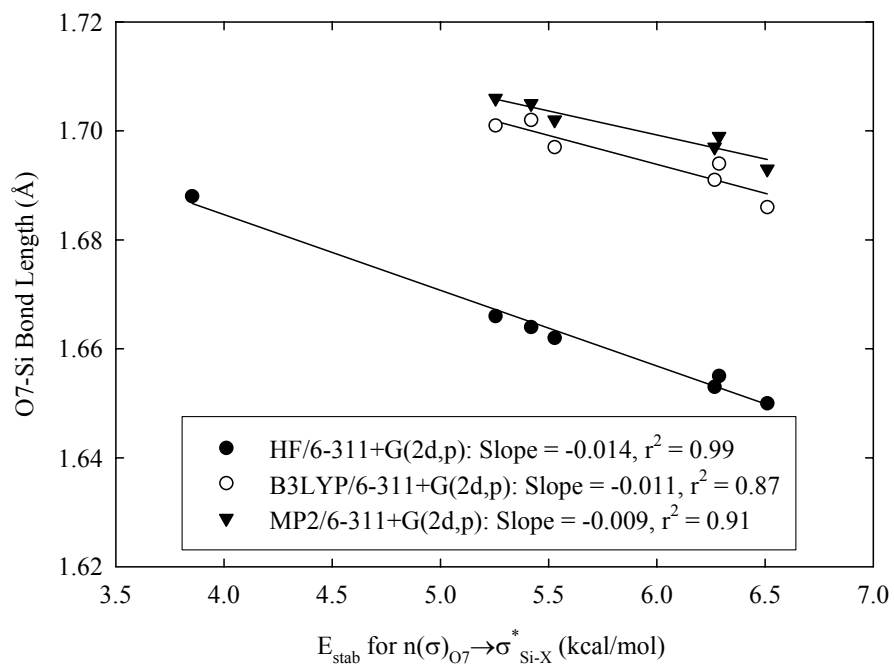

**Figure S 26** Plots of the O7-Si bond length versus stabilization energies  $E_{\text{stab}}$  due to  $n(\sigma)_{\text{O7}} \rightarrow \sigma^*_{\text{Si-X}}$  hyperconjugation in conformers **A(X)**. Note that  $E_{\text{stab}}$  also includes  $n(\sigma)_{\text{O7}} \rightarrow \text{RY}^*_{\text{Si}}$  interactions.

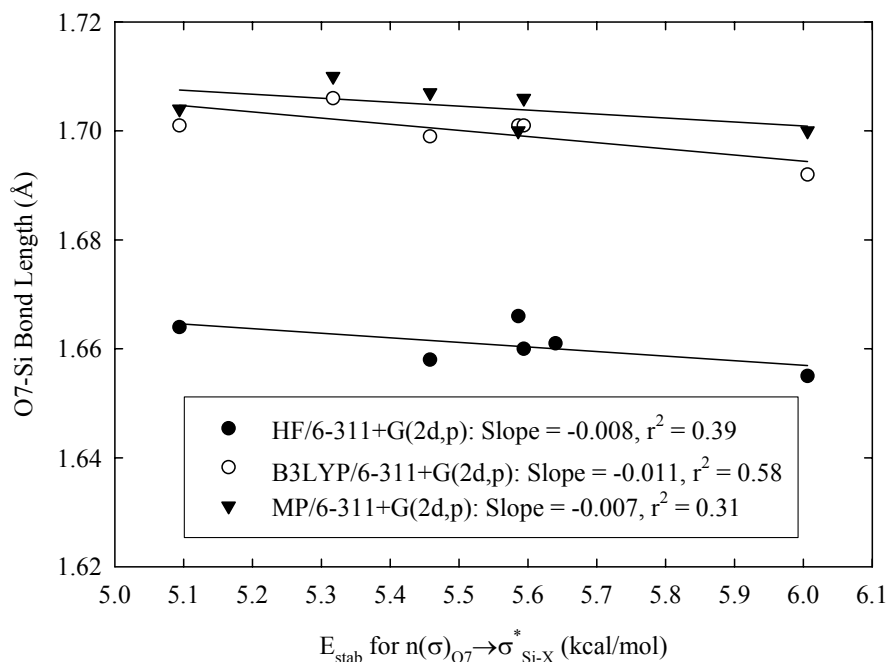

**Figure S 27** Plots of the O7-Si bond length versus stabilization energies  $E_{\text{stab}}$  due to  $n(\sigma)_{\text{O7}} \rightarrow \sigma^*_{\text{Si-X}}$  hyperconjugation in conformers B(X). Note that  $E_{\text{stab}}$  also includes  $n(\sigma)_{\text{O7}} \rightarrow \text{RY}^*_{\text{Si}}$  interactions.

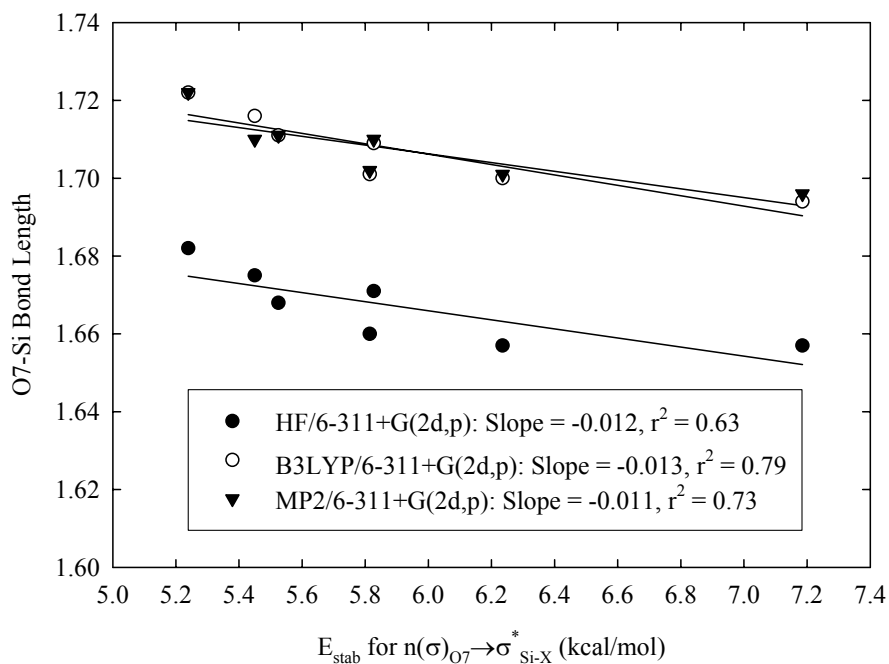

**Figure S 28** Plots of the O7-Si bond length versus stabilization energies  $E_{\text{stab}}$  due to  $n(\sigma)_{\text{O7}} \rightarrow \sigma^*_{\text{Si-X}}$  hyperconjugation in conformers C(X). Note that  $E_{\text{stab}}$  also includes  $n(\sigma)_{\text{O7}} \rightarrow \text{RY}^*_{\text{Si}}$  interactions.

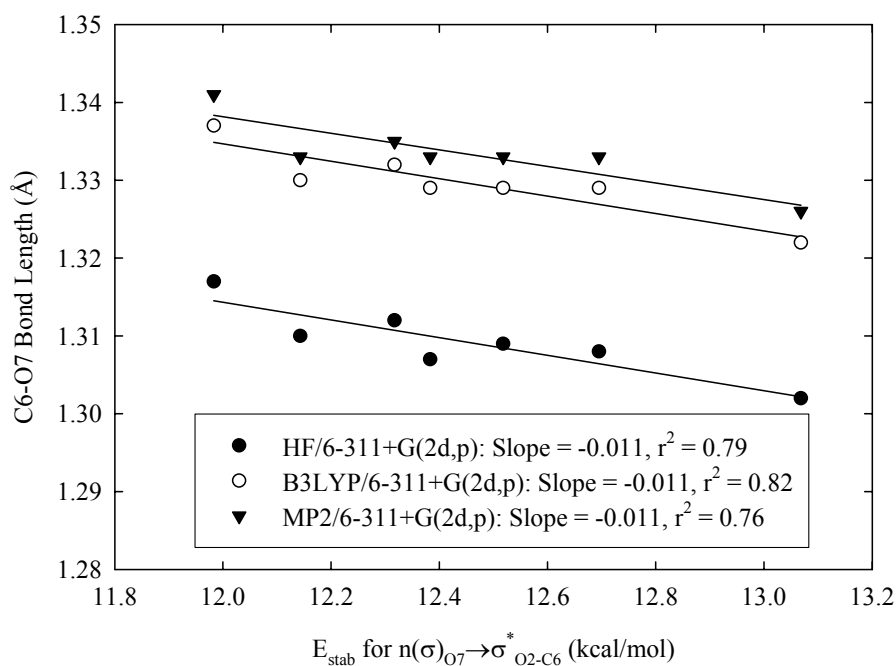

**Figure S 29** Plots of the C6-O7 bond length versus stabilization energies  $E_{\text{stab}}$  due to  $n(\sigma)_{\text{O7}} \rightarrow \sigma^*_{\text{O2-C6}}$  hyperconjugation in conformers **A(X)**. Note that  $E_{\text{stab}}$  also includes  $n(\sigma)_{\text{O7}} \rightarrow \text{RY}^*_{\text{C6}}$  interactions.

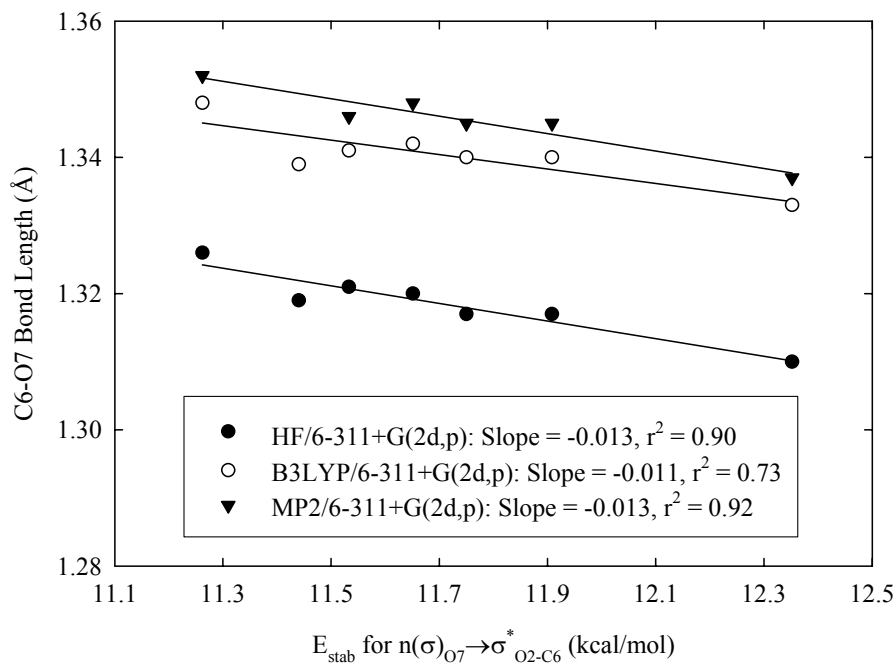

**Figure S 30** Plots of the C6-O7 bond length versus stabilization energies  $E_{\text{stab}}$  due to  $n(\sigma)_{\text{O7}} \rightarrow \sigma^*_{\text{O2-C6}}$  hyperconjugation in conformers **B(X)**. Note that  $E_{\text{stab}}$  also includes  $n(\sigma)_{\text{O7}} \rightarrow \text{RY}^*_{\text{C6}}$  interactions.



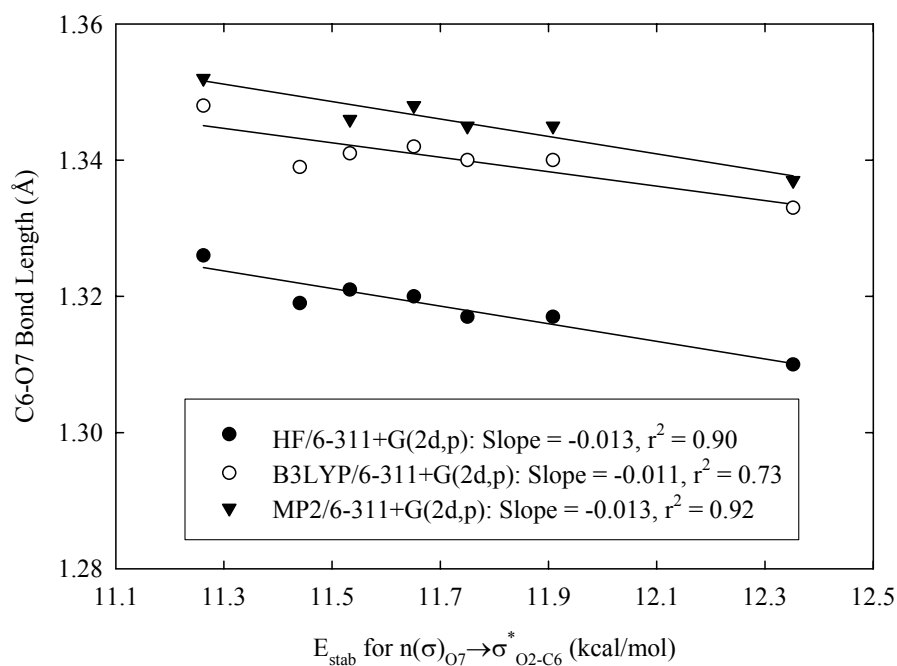

**Figure S 31** Plots of the C6-O7 bond length versus stabilization energies  $E_{\text{stab}}$  due to  $n(\sigma)_{\text{O7}} \rightarrow \sigma^*_{\text{O2-C6}}$  hyperconjugation in conformers **C(X)**. Note that  $E_{\text{stab}}$  also includes  $n(\sigma)_{\text{O7}} \rightarrow \text{RY}^*_{\text{C6}}$  interactions.

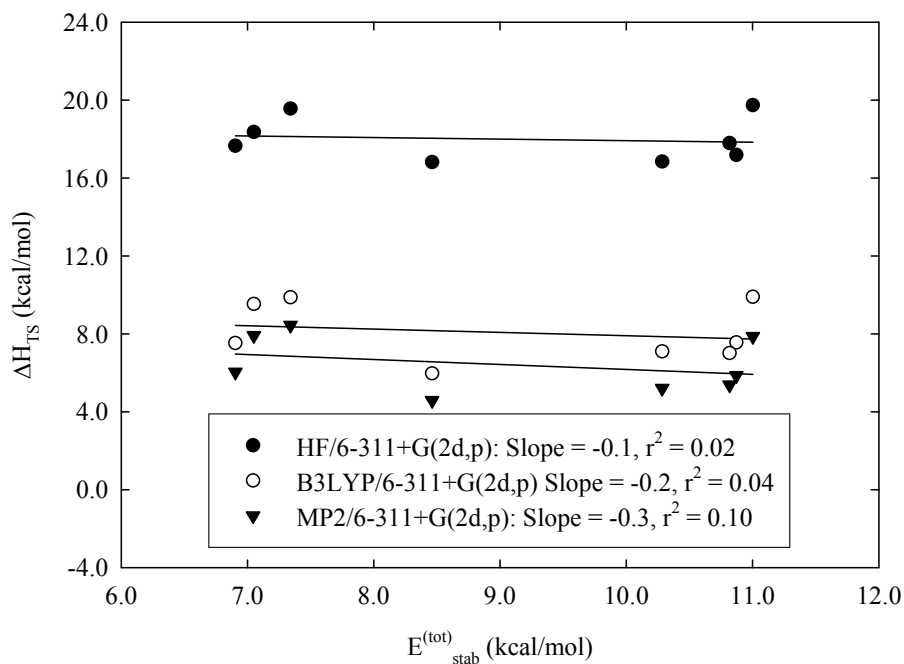

**Figure S 32** Plots of activation enthalpies for 1,2-silyl migration versus computed HF/6-311+G(2d,p) stabilization energies due to hyperconjugation in conformers **A(X)**.

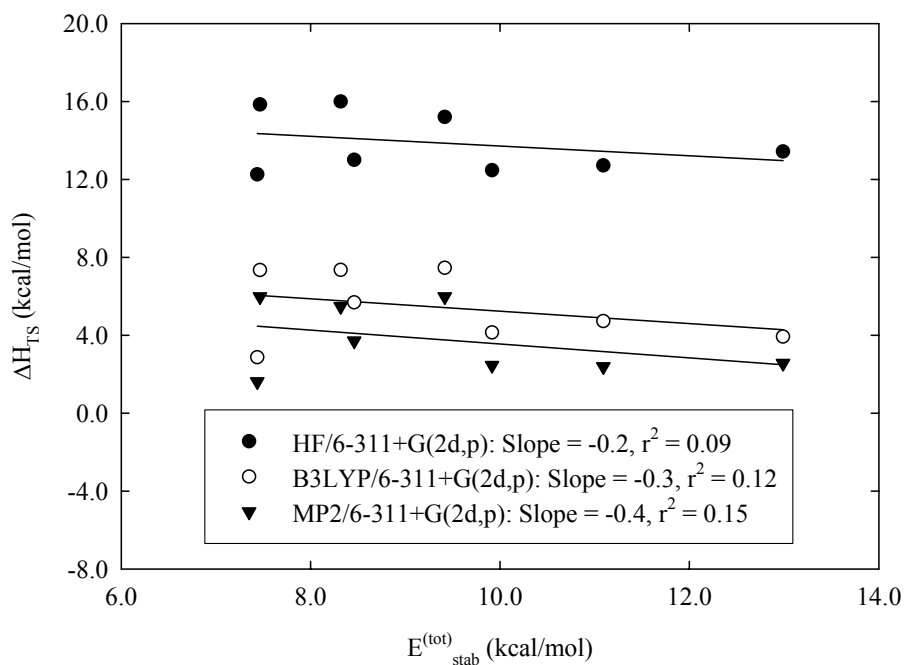

**Figure S 33** Plots of activation enthalpies for 1,2-silyl migration versus computed HF/6-311+G(2d,p) stabilization energies due to hyperconjugation in conformers **B(X)**.

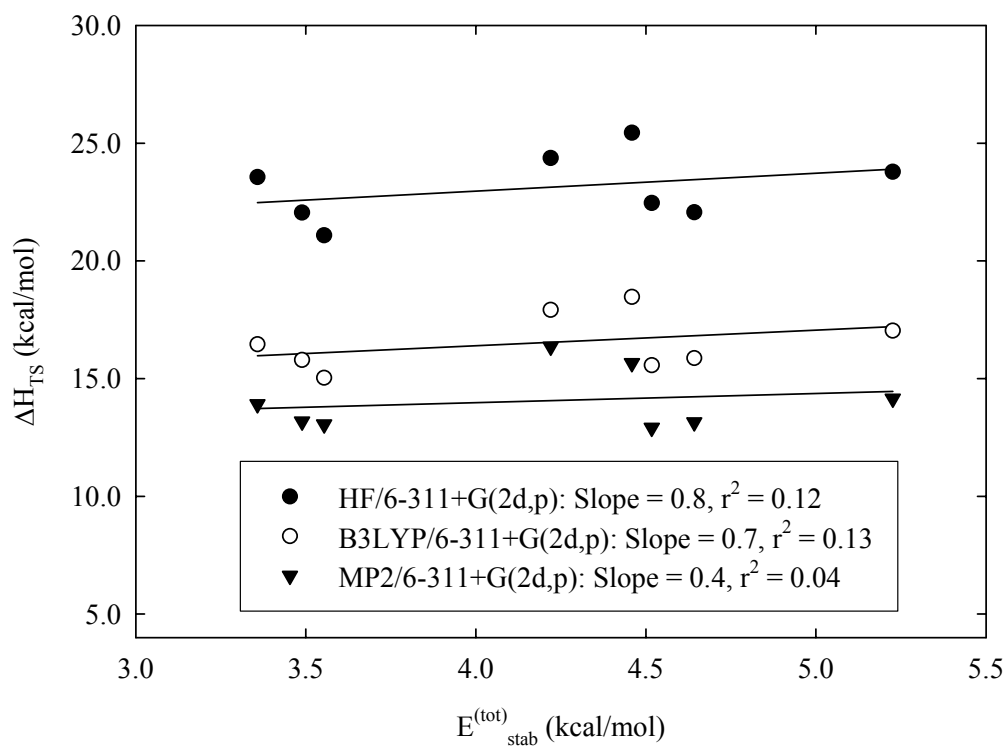

**Figure S 34** Plots of activation enthalpies for decarbonylation versus computed HF/6-311+G(2d,p) stabilization energies due to hyperconjugation in conformers **C(X)**.

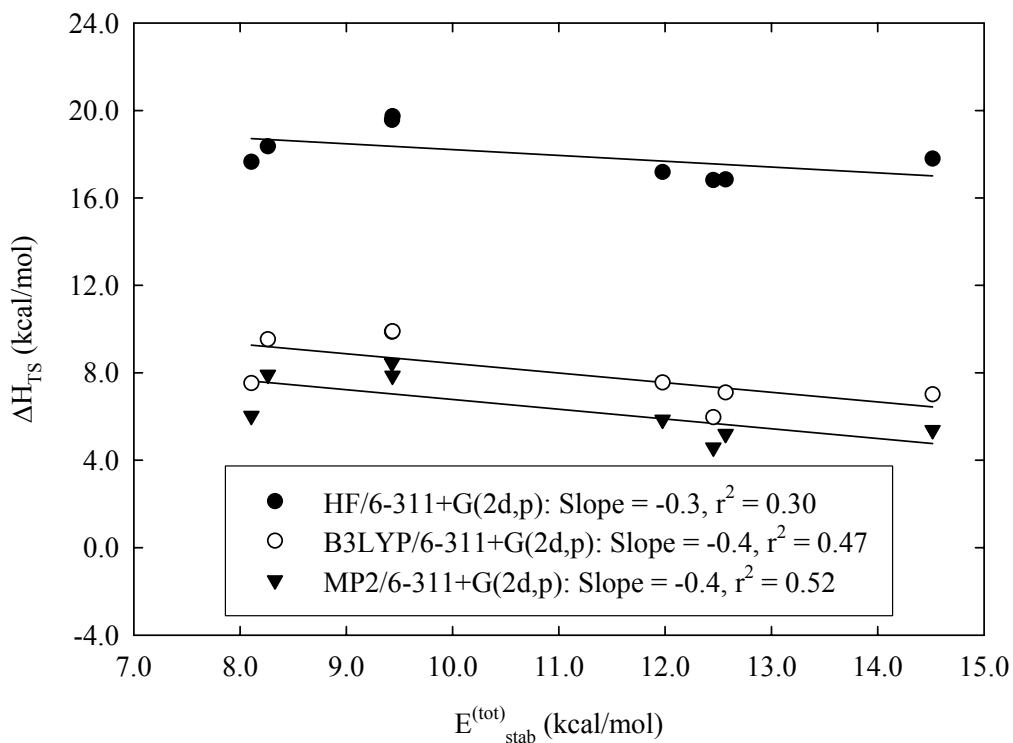

**Figure S 35** Plots of activation enthalpies for 1,2-silyl migration versus computed B3LYP/6-311+G(2d,p) stabilization energies due to hyperconjugation in conformers **A(X)**.

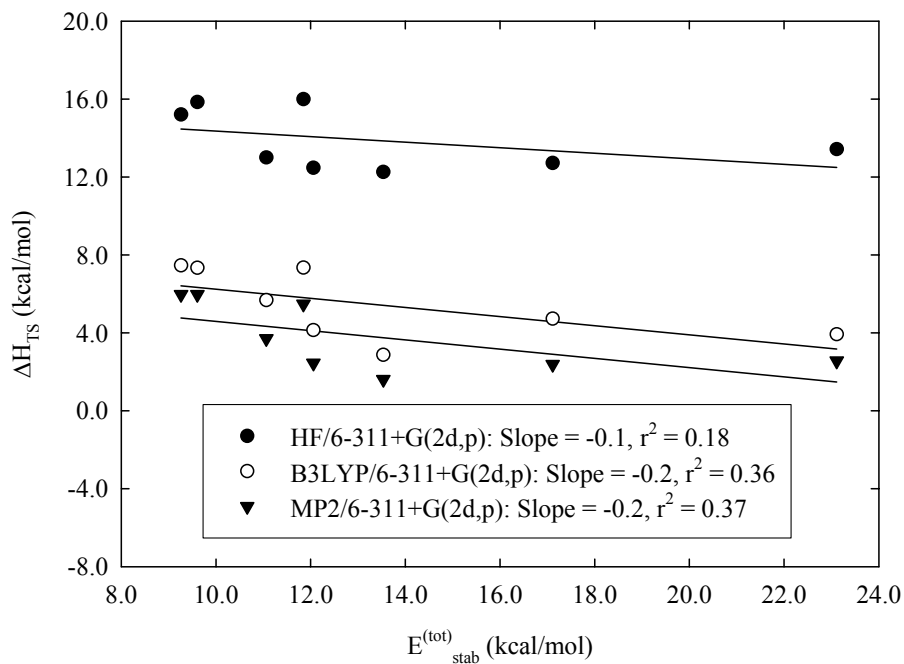

**Figure S 36** Plots of activation enthalpies for 1,2-silyl migration versus computed B3LYP/6-311+G(2d,p) stabilization energies due to hyperconjugation in conformers **B(X)**.

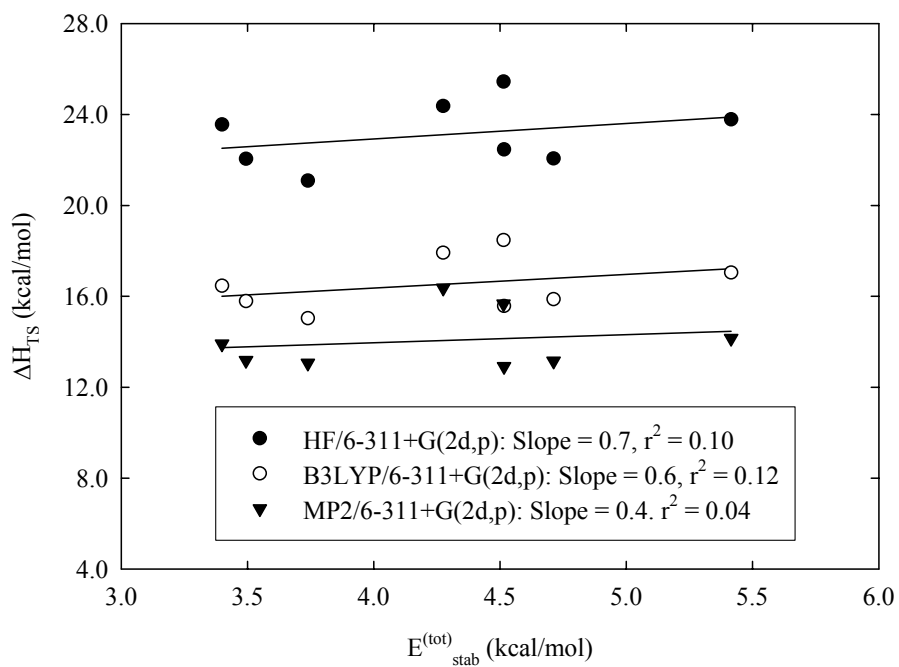

**Figure S 37** Plots of activation enthalpies for decarbonylation versus computed B3LYP/6-311+G(2d,p) stabilization energies due to hyperconjugation in conformers C(X).
